# Supplementary material
Source: publisher figshare collection journal article supplement (https://acs.figshare.com/ndownloader/files/8260457)
Supplement: Supplementary file 1 [file 8260457]

# Supporting Information

## Tungsten(VI)-Copper(I)-Sulfur Cluster-Supported Metal-Organic Frameworks Bridged by *in Situ* Click-Formed Tetrazolate Ligands

Qiu-Fang Chen,<sup>†,‡</sup> Xin Zhao,<sup>†</sup> Quan Liu,<sup>†</sup> Ji-Dong Jia,<sup>§</sup> Xiao-Ting Qiu,<sup>†</sup> Ying-Lin Song,<sup>§</sup> David James Young,<sup>¶</sup> Wen-Hua Zhang,<sup>\*,†</sup> and Jian-Ping Lang<sup>\*,†,‡</sup>

<sup>†</sup>State and Local Joint Engineering Laboratory for Novel Functional Polymeric Materials, College of Chemistry, Chemical Engineering and Materials Science, Soochow University, Suzhou 215123, Jiangsu, P. R. China

<sup>‡</sup>State Key Laboratory of Organometallic Chemistry, Shanghai Institute of Organic Chemistry, Chinese Academy of Sciences, Shanghai 200032, P. R. China

<sup>§</sup>School of Physical Science and Technology, Soochow University, Suzhou 215006, Jiangsu, P. R. China

<sup>¶</sup>Faculty of Science, Health, Education and Engineering, University of the Sunshine Coast, Maroochydore, Queensland 4558, Australia

---

To whom correspondence should be addressed. E-mail: [jplang@suda.edu.cn](mailto:jplang@suda.edu.cn) & [whzhang@suda.edu.cn](mailto:whzhang@suda.edu.cn)

<sup>†</sup> Soochow University

<sup>‡</sup> Shanghai Institute of Organic Chemistry

<sup>§</sup> Soochow University

<sup>¶</sup> University of the Sunshine Coast

## Contents

**Figure S1.** (a) PXRD patterns of **2**. Simulated (black), single-phase polycrystalline sample (red). (b) PXRD patterns of **3a** accompanied by the presence of **3b**. Simulated (**3a**, black; **3b**, blue), single-phase polycrystalline sample (red). (c) PXRD patterns of **3b**. Simulated (black), single-phase polycrystalline sample (red). (d) PXRD patterns of **4**. Simulated (black), single-phase polycrystalline sample (red). (e) PXRD patterns of **5**. Simulated (black), single-phase polycrystalline sample (red). (f) PXRD patterns of **6**. Simulated (black), single-phase polycrystalline sample (red). (g) PXRD patterns of **7**. Simulated (black), single-phase polycrystalline sample (red). (h) PXRD patterns of **8**. Simulated (black), single-phase polycrystalline sample (red)..... S5

**Figure S2.** The positive-ion ESI-MS patterns (top) and the calculated isotope patterns (below) of the  $\{[(\text{Tp}^*\text{WS}_3\text{Cu}_3)(\text{Btta})_3\text{Cu}_2\text{Na}]+\text{BF}_4+\text{CH}_3\text{OH}+\text{CH}_3\text{CN}\}^+$  cation in **5**. ..... S6

**Figure S3.** The positive-ion ESI-MS patterns (top) and the calculated isotope patterns (below) of the  $\{[(\text{Tp}^*\text{WS}_3\text{Cu}_3)(\text{Petta})\text{Cu}]+\text{BF}_4+\text{CH}_3\text{OH}\}^+$  (a),  $\{[(\text{Tp}^*\text{WS}_3\text{Cu}_3)(\text{Petta})_2\text{K}]+\text{CH}_3\text{OH}\}^+$  (b) and  $\{[(\text{Tp}^*\text{WS}_3\text{Cu}_3)(\text{Petta})_2\text{K}]+3\text{CH}_3\text{OH}\}^+$  (c) cations in **6**. ..... S6

**Figure S4.** The positive-ion ESI-MS patterns (top) and the calculated isotope patterns (below) of the  $\{[(\text{Tp}^*\text{WS}_3\text{Cu})(\text{Tp}^*\text{WS}_3\text{Cu}_2)(\text{S}')]+2\text{H}+3\text{CH}_3\text{OH}\}^+$  cation in **7**. ..... S7

**Figure S5.** The negative-ion ESI-MS patterns (top) and the calculated isotope patterns (below) of the  $[(\text{Tp}^*\text{WS}_3\text{Cu}_2)(\text{CN})_2]^-$  (a) and  $[(\text{Tp}^*\text{WS}_3\text{Cu}_3)(\text{CN})_3]^-$  (b) anions in **8**..... S7

**Table S1.** Selected Bond Lengths (Å) for **2–8**..... S8

**Figure S6.** (a) View of a cyclohexane-shaped  $\{[\text{Tp}^*\text{WS}_3\text{Cu}_3]_6(\text{Mtta})_6(\mu_3\text{-N}_3)_3\}^{3+}$  unit in a chair conformation. All  $\text{Tp}^*$  groups,  $\mu_3\text{-N}_3$  groups, methyl groups and hydrogen atoms are omitted for clarity. (b) The cell packing diagram of **2**. (c) A simplified representation of (b). The solid lines represent 2D layers, and the dotted lines represent the packing between layers. The blue units are the "Type I" spaces, and the green units are the "Type II" spaces..... S9

**Table S2.** The Variation Data of  $\alpha$ ,  $L$  and  $R$  in "Type I" Spaces for **2–6**..... S10

**Table S3.** The Variation Data of  $\alpha$ ,  $L'$  and  $R$  in "Type II" Spaces for **2–6**..... S10

**Figure S7.** The regular variation diagram of "Type I" spaces for **2–6**. **Error! Bookmark not defined.**

**Figure S8.** The  $\{(\text{Tp}^*\text{WS}_3\text{Cu}_3)[\text{Cu}_2(\text{CN})_5]\}_2^{2-}$  unit propagates along the *b* direction through the CN linkage to yield a 1D chain..... S11

**Figure S9.** Z-scan data for **6** ( $5 \times 10^{-5}$  M) in DMF solution investigated at 532 nm. (a) Normalized Z-scan data obtained under the open-aperture configuration showing the nonlinear absorption; (b) collected by dividing the normalized Z-scan data under closed-aperture configuration by that in (a) showing the nonlinear refraction. The black solid spheres are experimental data, and the red solid curves are the theoretical fit..... S11

**Figure S10.** Z-scan data for **7** ( $5 \times 10^{-5}$  M) in DMF solution investigated at 532 nm. (a) Normalized Z-scan data obtained under the open-aperture configuration showing the nonlinear absorption; (b) collected by dividing the normalized Z-scan data under closed-aperture configuration by that in (a) showing the nonlinear refraction. The black solid spheres are experimental data, and the red solid curves are the theoretical fit..... S12

**Figure S11.** Z-scan data for **8** ( $5 \times 10^{-5}$  M) in DMF solution investigated at 532 nm. (a) Normalized Z-scan data obtained under the open-aperture configuration showing the nonlinear absorption; (b) collected by dividing the normalized Z-scan data under closed-aperture configuration by that in (a) showing the nonlinear refraction. The black solid spheres are experimental data, and the red solid curves are the theoretical fit..... S12

**Table S4.** The Hyperpolarizability Values ( $\gamma$ ) of Some Known Mo(W)-Cu-S Clusters and Known NLO Active Materials..... S13

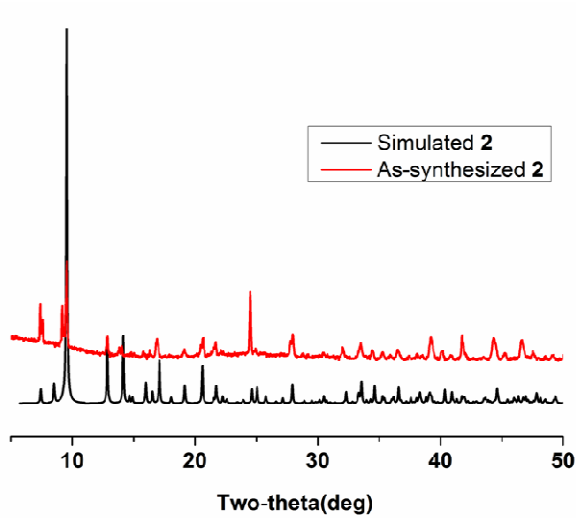

(a)

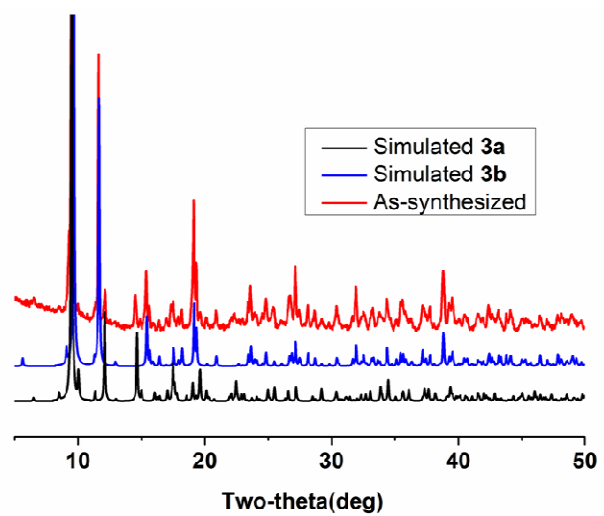

(b)

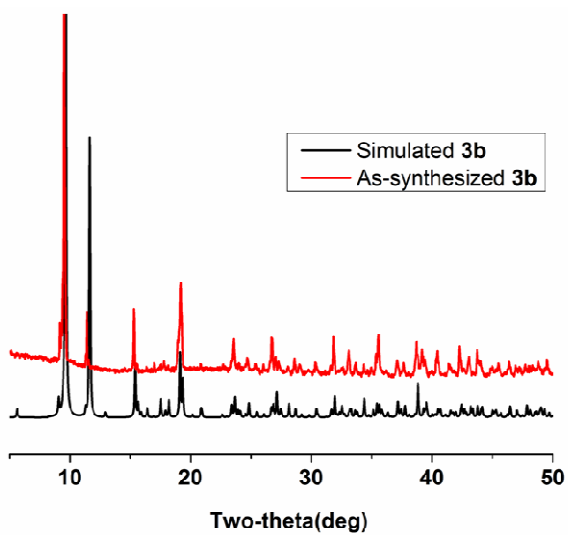

(c)

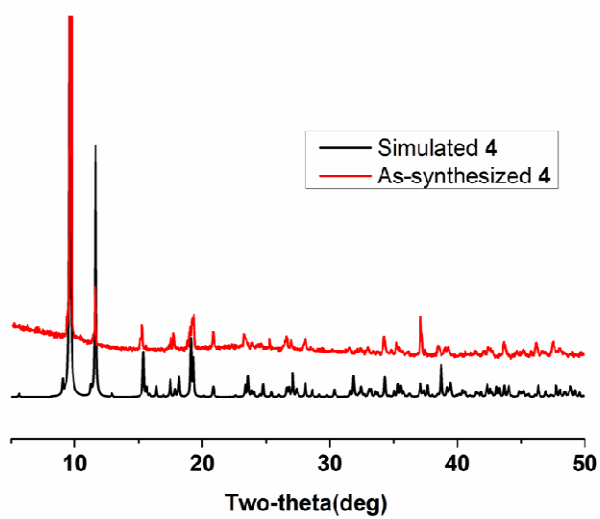

(d)

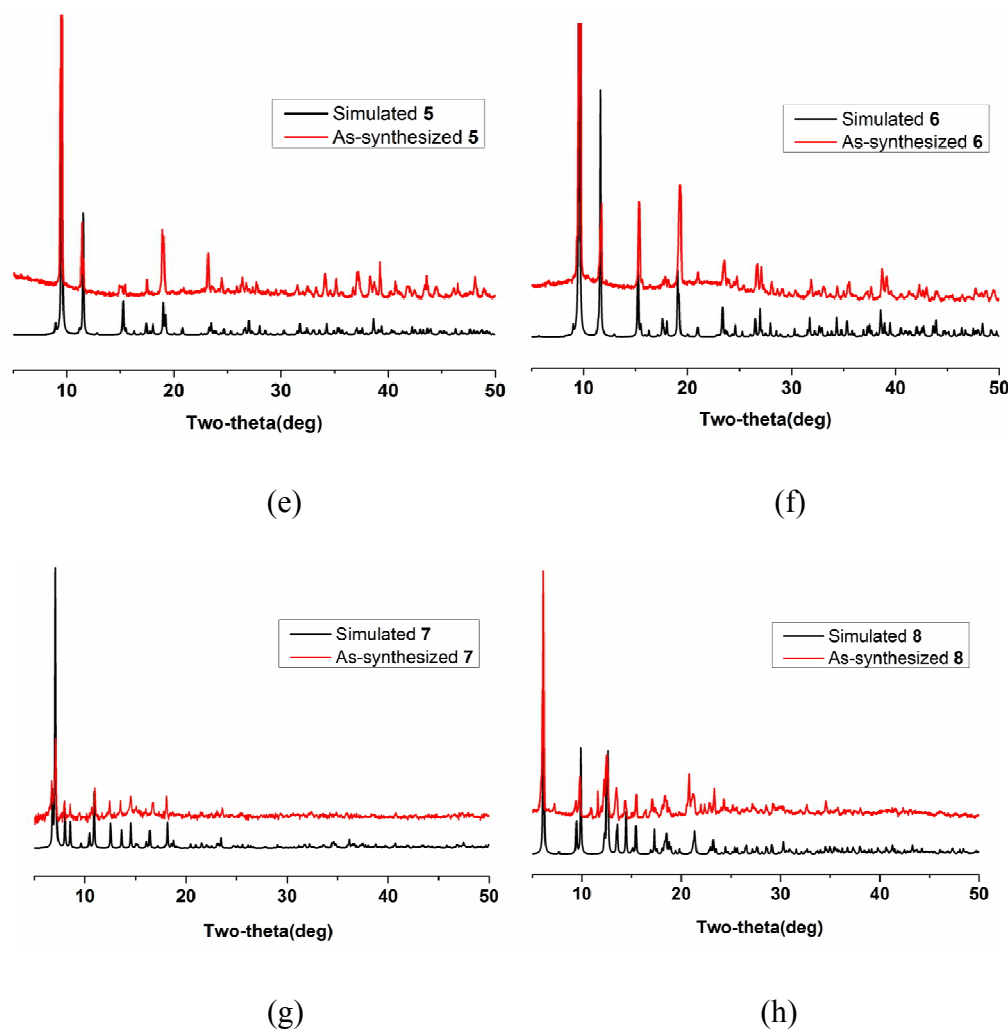

**Figure S1.** (a) PXRD patterns of **2**. Simulated (black), single-phase polycrystalline sample (red). (b) PXRD patterns of **3a** accompanied by the presence of **3b**. Simulated (**3a**, black; **3b**, blue), single-phase polycrystalline sample (red). (c) PXRD patterns of **3b**. Simulated (black), single-phase polycrystalline sample (red). (d) PXRD patterns of **4**. Simulated (black), single-phase polycrystalline sample (red). (e) PXRD patterns of **5**. Simulated (black), single-phase polycrystalline sample (red). (f) PXRD patterns of **6**. Simulated (black), single-phase polycrystalline sample (red). (g) PXRD patterns of **7**. Simulated (black), single-phase polycrystalline sample (red). (h) PXRD patterns of **8**. Simulated (black), single-phase polycrystalline sample (red).

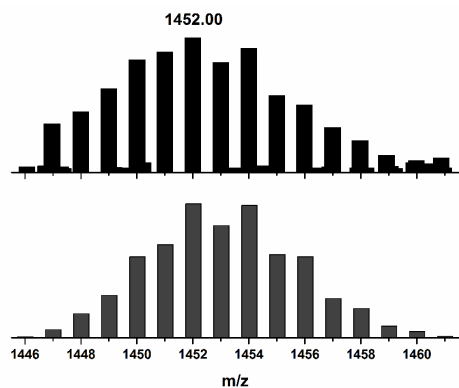

**Figure S2.** The positive-ion ESI-MS patterns (top) and the calculated isotope patterns (below) of the  $\{[(\text{Tp}^*\text{WS}_3\text{Cu}_3)(\text{Btta})_3\text{Cu}_2\text{Na}]+\text{BF}_4+\text{CH}_3\text{OH}+\text{CH}_3\text{CN}\}^+$  cation in **5**.

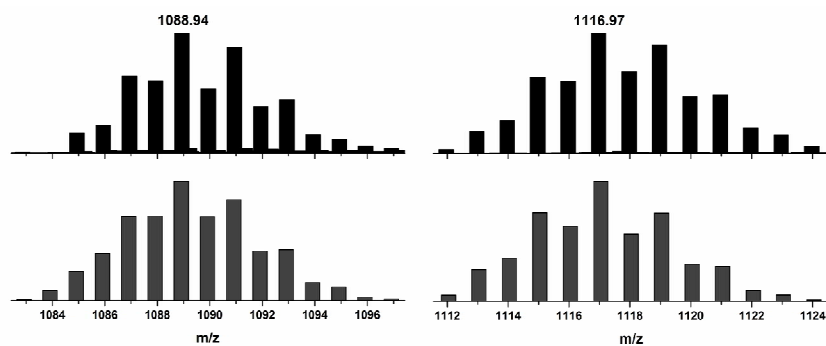

(a)

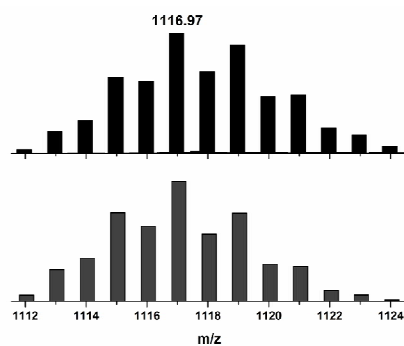

(b)

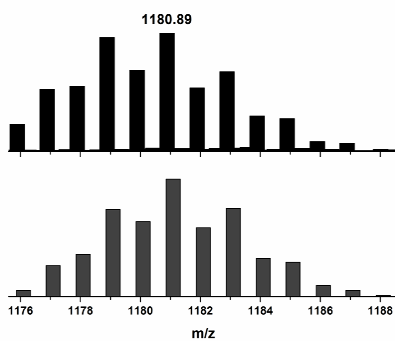

(c)

**Figure S3.** The positive-ion ESI-MS patterns (top) and the calculated isotope patterns (below) of the  $\{[(\text{Tp}^*\text{WS}_3\text{Cu}_3)(\text{Petta})\text{Cu}]+\text{BF}_4+\text{CH}_3\text{OH}\}^+$  (a),  $\{[(\text{Tp}^*\text{WS}_3\text{Cu}_3)(\text{Petta})_2\text{K}]+\text{CH}_3\text{OH}\}^+$  (b) and  $\{[(\text{Tp}^*\text{WS}_3\text{Cu}_3)(\text{Petta})_2\text{K}]+3\text{CH}_3\text{OH}\}^+$  (c) cations in **6**.

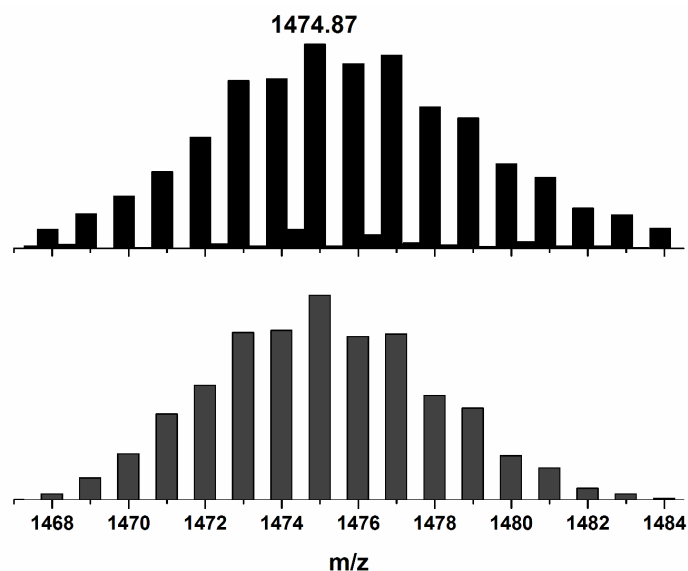

**Figure S4.** The positive-ion ESI-MS patterns (top) and the calculated isotope patterns (below) of the  $\{[(\text{Tp}^*\text{WS}_3\text{Cu})(\text{Tp}^*\text{WS}_3\text{Cu}_2)(\text{S}')]+2\text{H}+3\text{CH}_3\text{OH}\}^+$  cation in **7**.

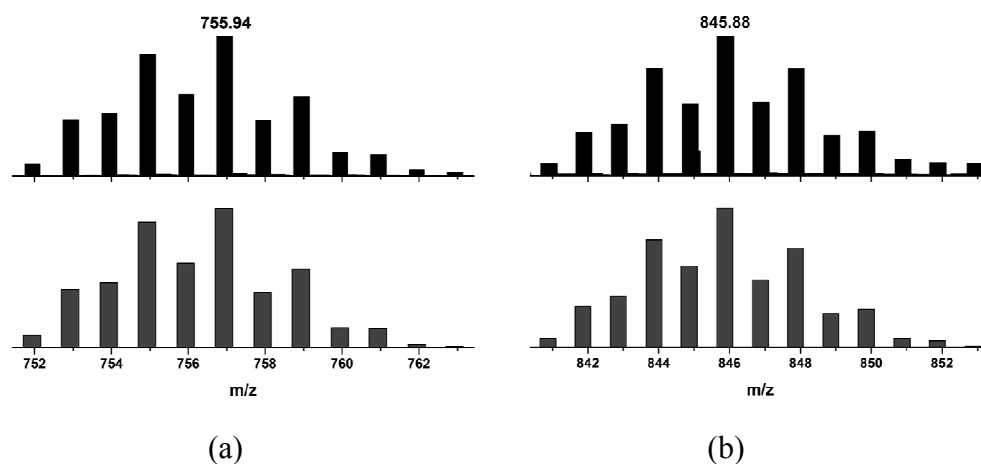

**Figure S5.** The negative-ion ESI-MS patterns (top) and the calculated isotope patterns (below) of the  $[(\text{Tp}^*\text{WS}_3\text{Cu}_2)(\text{CN})_2]^-$  (a) and  $[(\text{Tp}^*\text{WS}_3\text{Cu}_3)(\text{CN})_3]^-$  (b) anions in **8**.

**Table S1. Selected Bond Lengths (Å) for 2–8**

| Compound <b>2<sup>a</sup></b>  |            |                 |            |                |            |
|--------------------------------|------------|-----------------|------------|----------------|------------|
| W(1)···Cu(1)                   | 2.6384(5)  | W(1)···Cu(1)#1  | 2.6384(5)  | W(1)···Cu(1)#2 | 2.6384(5)  |
| Cu(1)···Cu(1)#1                | 2.9291(9)  | Cu(1)···Cu(1)#2 | 2.9291(9)  | Cu(1)-S(1)     | 2.2062(11) |
| Cu(1)-S(1)#1                   | 2.2099(11) | S(1)-Cu(1)#2    | 2.2100(11) | Cu(1)-N(3)     | 1.919(3)   |
| Compound <b>3a<sup>b</sup></b> |            |                 |            |                |            |
| W(1)···Cu(1)                   | 2.625(2)   | W(1)···Cu(1)#1  | 2.625(2)   | W(1)···Cu(1)#2 | 2.625(2)   |
| Cu(1)···Cu(1)#1                | 2.879(4)   | Cu(1)···Cu(1)#2 | 2.879(4)   | Cu(1)-S(1)     | 2.193(6)   |
| Cu(1)-S(1) #1                  | 2.192(6)   | S(1)-Cu(1)#2    | 2.192(6)   | Cu(1)-N(3)     | 1.921(16)  |
| W(2)···Cu(2)                   | 2.648(2)   | W(2)···Cu(2) #1 | 2.648(2)   | W(2)···Cu(2)#2 | 2.648(2)   |
| Cu(2)···Cu(2)#1                | 2.857(5)   | Cu(2)···Cu(2)#2 | 2.857(5)   | Cu(2)-S(2)     | 2.228(5)   |
| Cu(2)-S(2)#1                   | 2.214(6)   | S(2)-Cu(2)#2    | 2.214(6)   | Cu(2)-N(6)     | 1.933(16)  |
| Compound <b>3b<sup>c</sup></b> |            |                 |            |                |            |
| W(1)···Cu(1)                   | 2.6325(5)  | W(1)···Cu(1)#1  | 2.6323(5)  | W(1)···Cu(1)#2 | 2.6323(5)  |
| Cu(1)···Cu(1)#1                | 2.8919(9)  | Cu(1)···Cu(1)#2 | 2.8919(10) | Cu(1)-S(1)     | 2.2012(12) |
| S(1)-Cu(1)#1                   | 2.2043(12) | Cu(1)-S(1)#2    | 2.2045(12) | Cu(1)-N(1)     | 1.908(4)   |
| Compound <b>4<sup>d</sup></b>  |            |                 |            |                |            |
| W(1)···Cu(1)                   | 2.6278(8)  | W(1)···Cu(1)#1  | 2.6278(8)  | W(1)···Cu(1)#2 | 2.6278(8)  |
| Cu(1)···Cu(1)#1                | 2.8997(14) | Cu(1)···Cu(1)#2 | 2.8997(14) | Cu(1)-S(1)     | 2.2088(17) |
| Cu(1)-S(1)#1                   | 2.1952(17) | S(1)-Cu(1)#2    | 2.1950(17) | Cu(1)-N(3)     | 1.901(6)   |
| Compound <b>5<sup>a</sup></b>  |            |                 |            |                |            |
| W(1)···Cu(1)                   | 2.6283(7)  | W(1)···Cu(1)#1  | 2.6285(7)  | W(1)···Cu(1)#2 | 2.6285(7)  |
| Cu(1)···Cu(1)#1                | 2.8982(14) | Cu(1)···Cu(1)#2 | 2.8983(13) | Cu(1)-S(1)     | 2.1955(16) |
| Cu(1)-S(1)#1                   | 2.2002(16) | S(1)-Cu(1)#2    | 2.2004(15) | Cu(1)-N(1)     | 1.894(6)   |
| Compound <b>6<sup>b</sup></b>  |            |                 |            |                |            |
| W(1)···Cu(1)                   | 2.6299(7)  | W(1)···Cu(1)#1  | 2.6300(7)  | W(1)···Cu(1)#2 | 2.6300(7)  |
| Cu(1)···Cu(1)#1                | 2.8898(13) | Cu(1)···Cu(1)#2 | 2.8898(13) | Cu(1)-S(1)     | 2.1931(16) |
| Cu(1)-S(1)#2                   | 2.2049(16) | S(1)-Cu(1)#1    | 2.2046(16) | Cu(1)-N(1)     | 1.902(5)   |
| Compound <b>7<sup>e</sup></b>  |            |                 |            |                |            |
| W(1)···Cu(1)                   | 2.6637(18) | W(1)···Cu(2)    | 2.6680(15) | W(1)···Cu(3)   | 2.6762(18) |
| Cu(1)···Cu(2)                  | 2.8642(16) | Cu(1)···Cu(3)   | 2.916(2)   | Cu(2)···Cu(3)  | 2.8936(16) |
| Cu(1)-S(1)                     | 2.2197(19) | Cu(1)-S(2)      | 2.229(2)   | Cu(1)-S(4)     | 2.187(2)   |
| Cu(2)-S(2)                     | 2.218(2)   | Cu(2)-S(3)      | 2.224(2)   | Cu(2)-S(4)#1   | 2.1833(19) |
| Cu(3)-S(1)                     | 2.2280(19) | Cu(3)-S(3)      | 2.214(2)   | Cu(3)-S(4)#2   | 2.190(2)   |
| S(4)-Cu(2)#3                   | 2.1833(19) | S(4)-Cu(3)#2    | 2.190(2)   |                |            |
| Compound <b>8<sup>f</sup></b>  |            |                 |            |                |            |
| W(1)···Cu(1)                   | 2.6721(13) | W(1)···Cu(2)    | 2.6548(15) | W(1)···Cu(3)   | 2.6539(14) |
| Cu(1)···Cu(2)                  | 2.954(2)   | Cu(1)···Cu(3)   | 2.9635(19) | Cu(2)···Cu(3)  | 2.9940(17) |
| Cu(1)-S(1)                     | 2.237(3)   | Cu(1)-S(2)      | 2.213(3)   | Cu(1)-C(1)     | 1.899(9)   |
| Cu(2)-S(2)                     | 2.220(3)   | Cu(2)-S(3)      | 2.225(3)   | Cu(2)-C(5)#1   | 1.885(9)   |
| Cu(3)-S(1)                     | 2.214(3)   | Cu(3)-S(3)      | 2.204(3)   | Cu(3)-C(4)#2   | 1.898(9)   |
| Cu(4)-C(2)                     | 1.911(7)   | Cu(4)-C(3)      | 1.869(8)   | Cu(4)-N(1)     | 1.942(9)   |
| Cu(5)-N(3)                     | 1.923(9)   | Cu(5)-N(4)      | 1.939(8)   | Cu(5)-N(5)     | 1.942(9)   |



<sup>a</sup>Symmetry codes for **2** and **5**: #1,  $-y + 2, x - y + 1, z$ ; #2,  $-x + y + 1, -x + 2, z$ . <sup>b</sup>Symmetry codes for **3a** and **6**: #1,  $-y + 1, x - y + 2, z$ ; #2,  $-x + y - 1, -x + 1, z$ . <sup>c</sup>Symmetry codes for **3b**: #1,  $-x + y + 1, -x + 1, z$ ; #2,  $-y + 1, x - y, z$ . <sup>d</sup>Symmetry codes for **4**: #1,  $-y + 1, x - y + 1, z$ ; #2,  $-x + y, -x + 1, z$ . <sup>e</sup>Symmetry codes for **7**: #1,  $y + 1/4, -x + 3/4, z$ ; #2,  $-x + 1, -y + 1/2, z$ ; #3,  $-y + 3/4, x - 1/4, -z + 1/4$ . <sup>f</sup>Symmetry codes for **8**: #1,  $-x, -y + 1, z$ ; #2,  $-x + 1, -y + 1, -z$ .

---

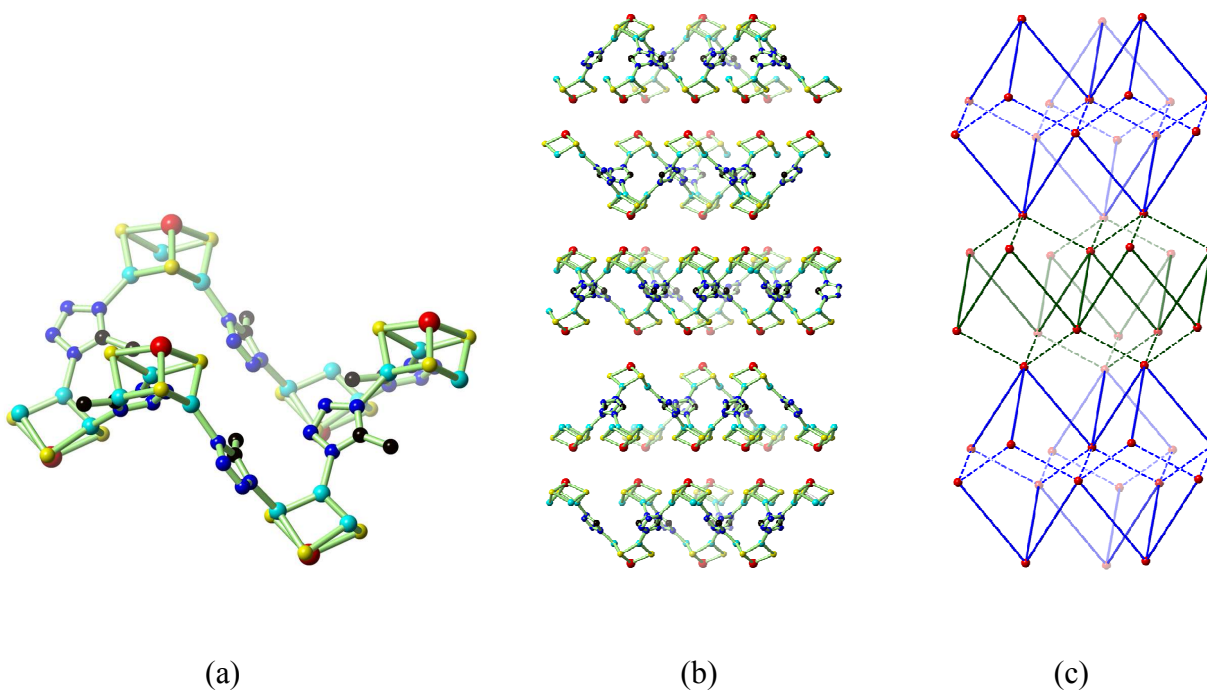

**Figure S6.** (a) View of a cyclohexane-shaped  $\{[\text{Tp}^*\text{WS}_3\text{Cu}_3]_6(\text{Mtta})_6(\mu_3\text{-N}_3)_3\}^{3+}$  unit in a chair conformation. All  $\text{Tp}^*$  groups,  $\mu_3\text{-N}_3$  groups, methyl groups and hydrogen atoms are omitted for clarity. (b) The cell packing diagram of **2**. (c) A simplified representation of (b). The solid lines represent 2D layers, and the dotted lines represent the packing between layers. The blue units are the "Type I" spaces, and the green units are the "Type II" spaces.

**Table S2.** The Variation Data of  $\alpha$ ,  $L$  and  $R$  in "Type I" Spaces for **2–6**

|                | <b>2</b> | <b>3a</b>         | <b>3b</b> | <b>4</b> | <b>5</b> | <b>6</b> |
|----------------|----------|-------------------|-----------|----------|----------|----------|
| $\alpha$ (deg) | 134.3    | 130.4             | 124       | 123.8    | 125.1    | 126.6    |
| $L$ (Å)        | 20.107   | 20.594/<br>23.737 | 24.493    | 24.542   | 24.472   | 24.336   |
| $R$ (Å)        | 7.220    | 6.980             | 6.634     | 6.650    | 6.656    | 6.715    |

**Table S3.** The Variation Data of  $\alpha$ ,  $L'$  and  $R$  in "Type II" Spaces for **2–6**

|                | <b>2</b> | <b>3a</b> | <b>3b</b> | <b>4</b> | <b>5</b> | <b>6</b> |
|----------------|----------|-----------|-----------|----------|----------|----------|
| $\alpha$ (deg) | 134.3    | 130.4     | 124       | 123.8    | 125.1    | 126.6    |
| $L'$ (Å)       | 15.546   | 18.712    | 22.479    | 22.525   | 22.474   | 22.256   |
| $R$ (Å)        | 7.220    | 6.980     | 6.634     | 6.650    | 6.656    | 6.715    |

$L'$  is the W···W separation of the two W atom overlapped along the  $c$  direction (polar axis) in "Type II".

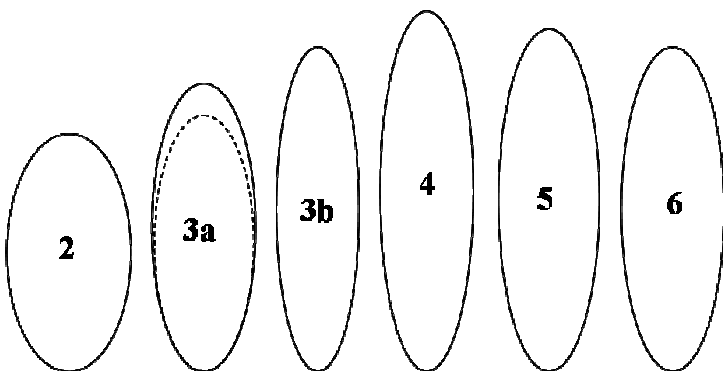

**Figure S7.** The regular variation diagram of "Type I" spaces for **2–6**.

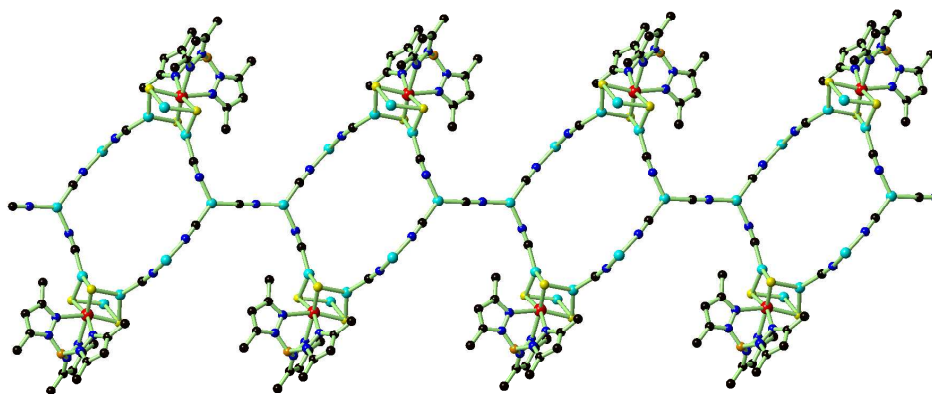

**Figure S8.** The  $\{(\text{Tp}^*\text{WS}_3\text{Cu}_3)[\text{Cu}_2(\text{CN})_5]\}_2^{2-}$  unit propagates along the  $b$  direction through the CN linkage to yield a 1D chain.

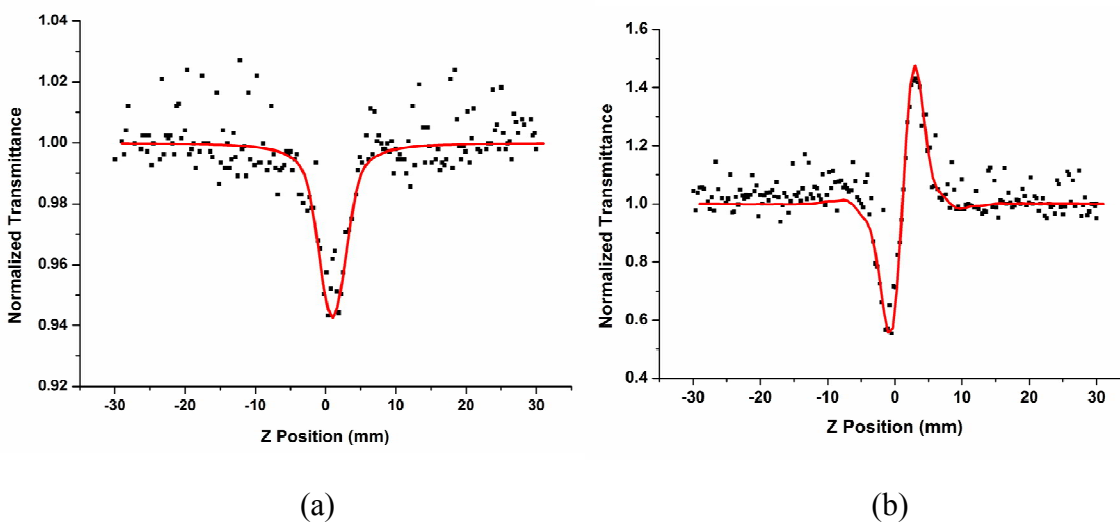

**Figure S9.** Z-scan data for **6** ( $5 \times 10^{-5}$  M) in DMF solution investigated at 532 nm. (a) Normalized Z-scan data obtained under the open-aperture configuration showing the nonlinear absorption; (b) collected by dividing the normalized Z-scan data under closed-aperture configuration by that in (a) showing the nonlinear refraction. The black solid spheres are experimental data, and the red solid curves are the theoretical fit.

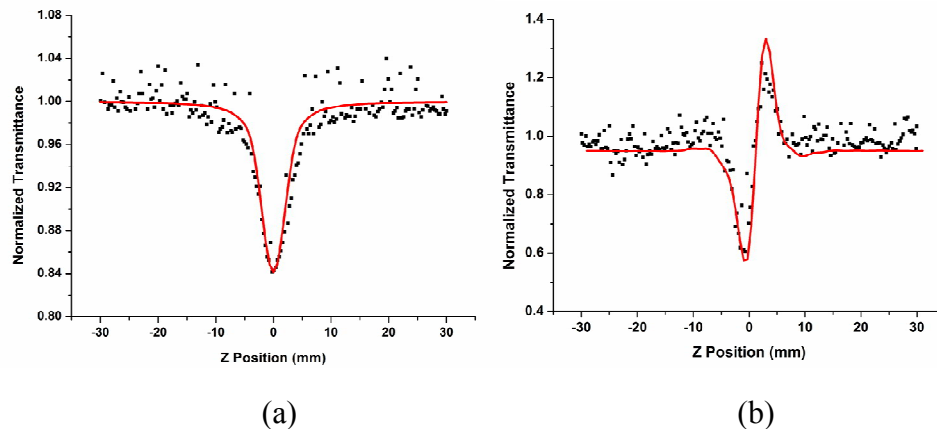

**Figure S10.** Z-scan data for **7** ( $5 \times 10^{-5}$  M) in DMF solution investigated at 532 nm. (a) Normalized Z-scan data obtained under the open-aperture configuration showing the nonlinear absorption; (b) collected by dividing the normalized Z-scan data under closed-aperture configuration by that in (a) showing the nonlinear refraction. The black solid spheres are experimental data, and the red solid curves are the theoretical fit.

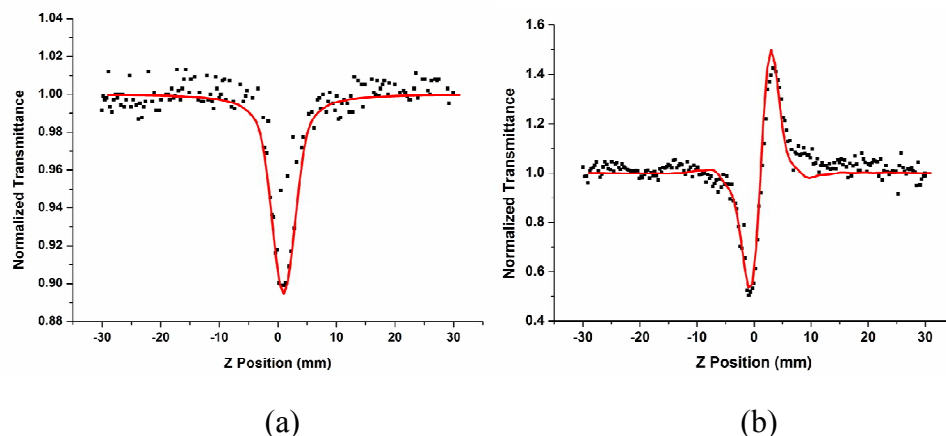

**Figure S11.** Z-scan data for **8** ( $5 \times 10^{-5}$  M) in DMF solution investigated at 532 nm. (a) Normalized Z-scan data obtained under the open-aperture configuration showing the nonlinear absorption; (b) collected by dividing the normalized Z-scan data under closed-aperture configuration by that in (a) showing the nonlinear refraction. The black solid spheres are experimental data, and the red solid curves are the theoretical fit.

**Table S4.** The Hyperpolarizability Values ( $\gamma$ ) of Some Reported Mo(W)-Cu-S Clusters and Known NLO Active Materials

| Compound                                                                                                        | $\gamma$ (esu)         | Ref. |
|-----------------------------------------------------------------------------------------------------------------|------------------------|------|
| <b>1</b>                                                                                                        | $1.07 \times 10^{-32}$ | 70   |
| C <sub>60</sub>                                                                                                 | $7.50 \times 10^{-34}$ | 88   |
| C <sub>70</sub>                                                                                                 | $1.30 \times 10^{-33}$ | 88   |
| [WOS <sub>3</sub> Cu <sub>2</sub> (4- <sup>t</sup> BuPy) <sub>2</sub> ] <sub>2</sub>                            | $4.80 \times 10^{-30}$ | 83   |
| {[Et <sub>4</sub> N] <sub>2</sub> [MoOS <sub>3</sub> Cu <sub>2</sub> (CN)] <sub>2</sub> ·2aniline} <sub>n</sub> | $6.78 \times 10^{-29}$ | 49   |
| {[Et <sub>4</sub> N] <sub>2</sub> [MoOS <sub>3</sub> Cu <sub>3</sub> (CN) <sub>3</sub> ]} <sub>n</sub>          | $2.47 \times 10^{-28}$ | 49   |
| {[Bu <sub>4</sub> N][WS <sub>4</sub> Cu <sub>3</sub> (CN) <sub>2</sub> ]} <sub>n</sub>                          | $3.40 \times 10^{-30}$ | 84   |
| [Cp*Mo <sub>2</sub> S <sub>4</sub> Cu <sub>2</sub> (dppe)] <sub>2</sub> (ClO <sub>4</sub> ) <sub>4</sub>        | $6.99 \times 10^{-29}$ | 85   |
| [Cp*MoS <sub>3</sub> Cu <sub>3</sub> (pyz)(NCS) <sub>2</sub> ] <sub>n</sub>                                     | $2.99 \times 10^{-29}$ | 86   |
| [(Cp*MoS <sub>3</sub> Cu <sub>3</sub> ) <sub>2</sub> (bpea) <sub>3</sub> Br <sub>4</sub> ] <sub>n</sub>         | $4.00 \times 10^{-29}$ | 53   |
| [(Cp*) <sub>2</sub> Mo <sub>2</sub> S <sub>4</sub> (CuI) <sub>2</sub> ]                                         | $1.18 \times 10^{-29}$ | 87   |
| {[Et <sub>4</sub> N][Tp*WS <sub>3</sub> (CuSCN) <sub>3</sub> (Cu- $\mu_3$ -NCS)]} <sub>n</sub>                  | $4.60 \times 10^{-32}$ | 68   |
| [Tp*W( $\mu_3$ -S)( $\mu$ -S) <sub>2</sub> Cu <sub>2</sub> (SCN)(bpp)] <sub>2</sub>                             | $4.80 \times 10^{-32}$ | 67   |
| [(Tp*WS <sub>3</sub> Cu <sub>2</sub> Cl) <sub>2</sub> (dppe)]                                                   | $4.71 \times 10^{-30}$ | 57   |
| [(Tp*WS <sub>3</sub> Cu <sub>2</sub> Cl) <sub>2</sub> (dppbS <sub>2</sub> )]·2MeCN·2H <sub>2</sub> O            | $6.13 \times 10^{-30}$ | 57   |
| [Tp*WS <sub>3</sub> Cu <sub>2</sub> (CN) <sub>2</sub> Cu( $\mu$ -py) <sub>2</sub> ] <sub>2</sub> ·3py           | $7.07 \times 10^{-30}$ | 59   |
| [Tp*WS <sub>3</sub> Cu <sub>2</sub> (CN)( $\mu_6$ -tpt) <sub>1/3</sub> ] <sub>2</sub>                           | $6.32 \times 10^{-30}$ | 59   |
